# Supplementary material for: Water-soluble chiral coordination polymers of Li+, Na+, K+, and Ba2+ with an anionic iron(iii) complex of a l-threonine derivative and a significant red shift of visible spectra with Al3+ salt
Source: Royal Society of Chemistry journal article supplement (doi:10.1039/d3dt03945e), 2024-01-01
Supplement: d3dt03945e1.pdf [file d3dt03945e1.pdf]

## Supplementary Information

### **Water-soluble chiral coordination polymers of Li<sup>+</sup>, Na<sup>+</sup>, K<sup>+</sup>, and Ba<sup>2+</sup> with an anionic Iron(III) complex of L-threonine derivative and significant red shift of visible spectra with Al<sup>3+</sup> salt**

Chanreingam Long<sup>a</sup> and Manabendra Ray<sup>\*a</sup>

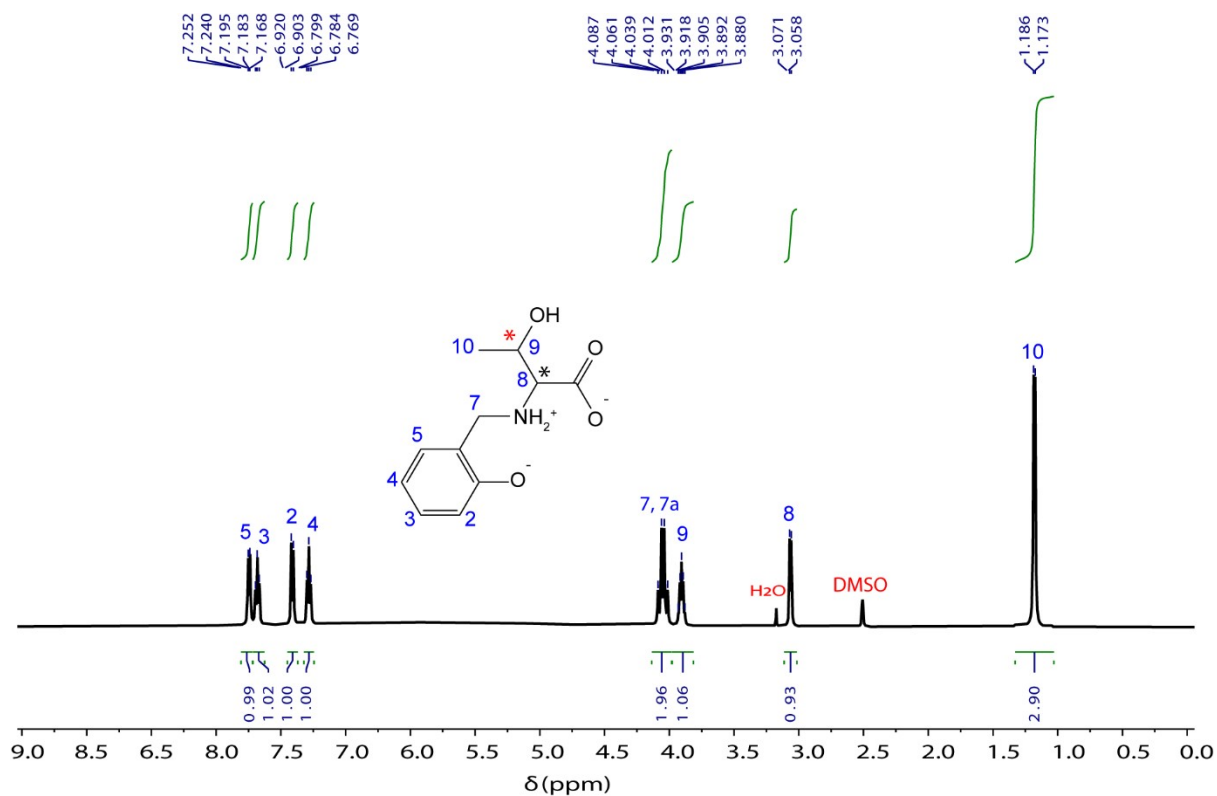

Figure S1. <sup>1</sup>H NMR of H<sub>2</sub>L<sup>-</sup>thr in d<sub>6</sub>-DMSO recorded on a 500 MHz spectrometer.

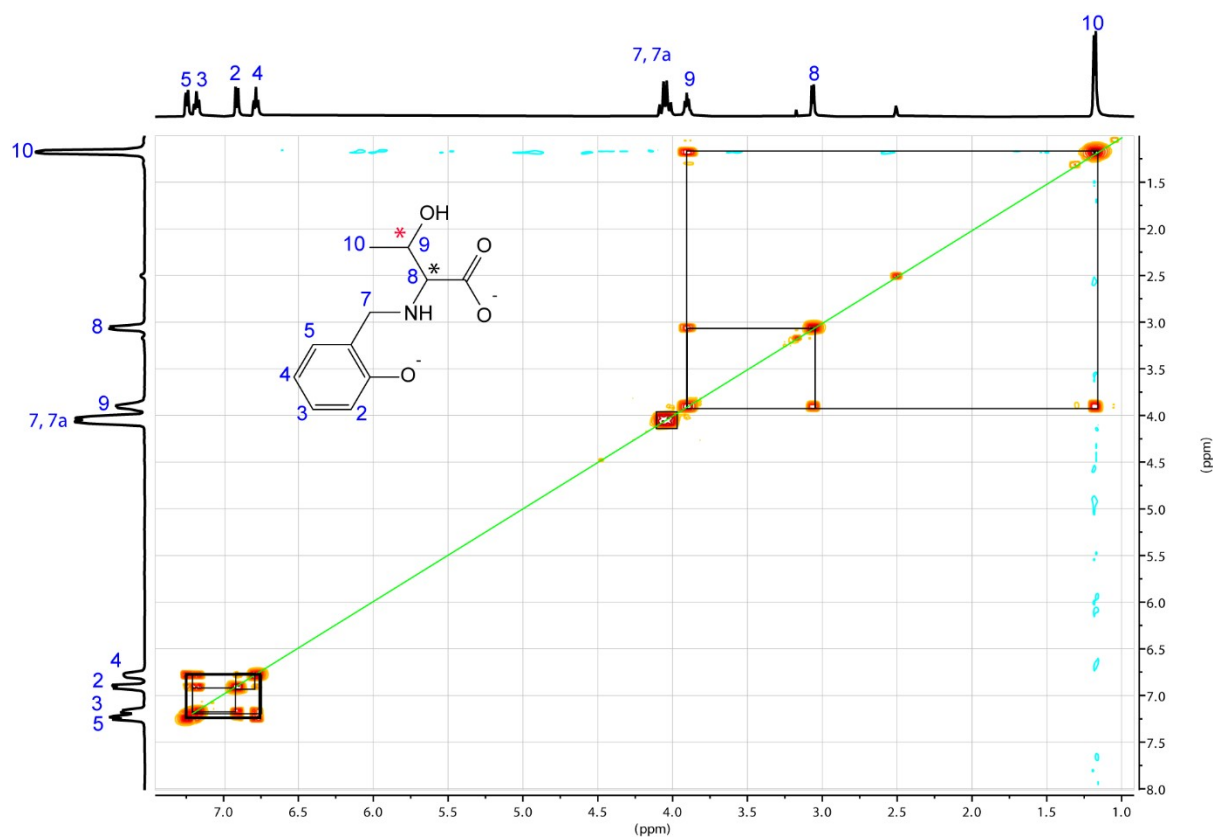

Figure S2. <sup>1</sup>H COSY spectra of H<sub>2</sub>L<sup>-</sup>thr in d<sub>6</sub>-DMSO recorded on a 500 MHz spectrometer.

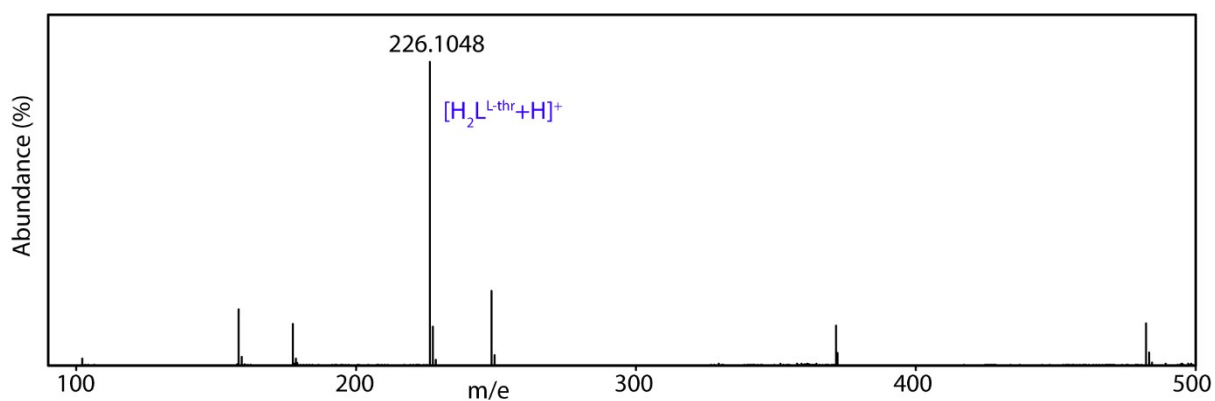

**Figure S3.** Positive ion mode ESI-MS spectrum of  $H_2L^{L-thr}$  in MeOH.

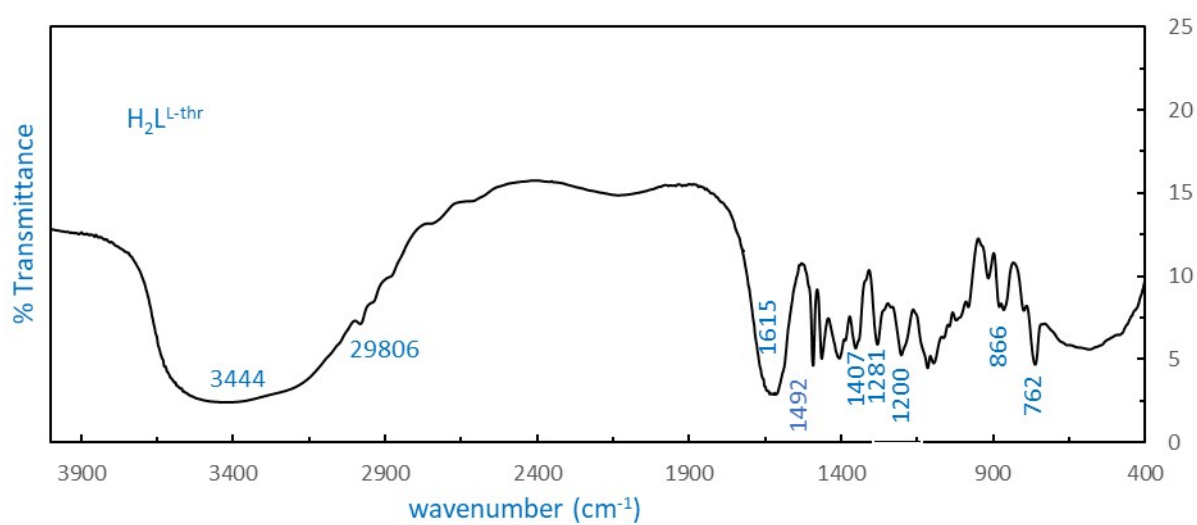

**Figure S4.** FTIR spectra of  $H_2L^{L-thr}$ .

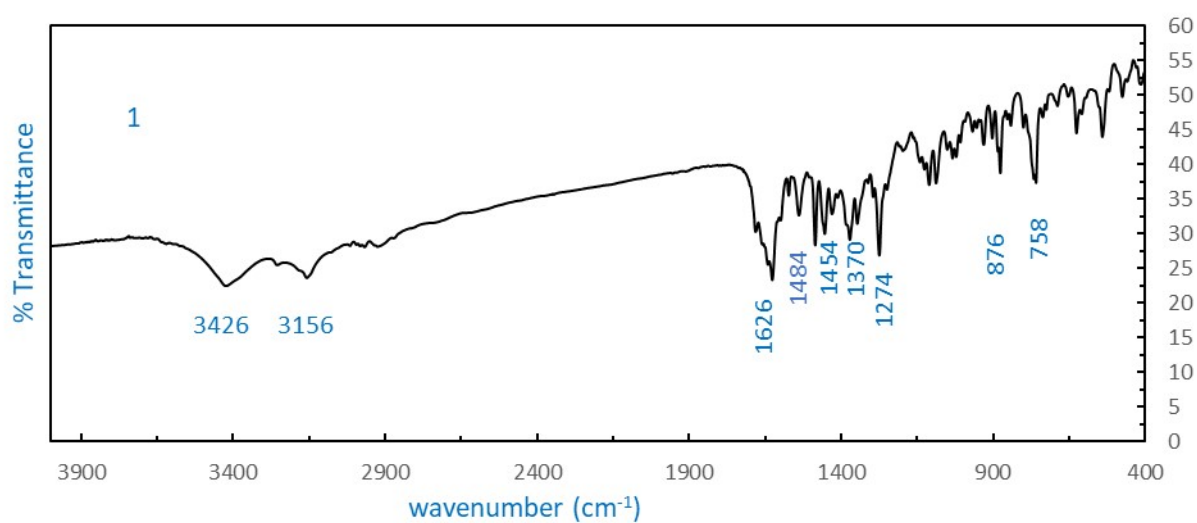

**Figure S5.** FTIR spectra of Complex 1.

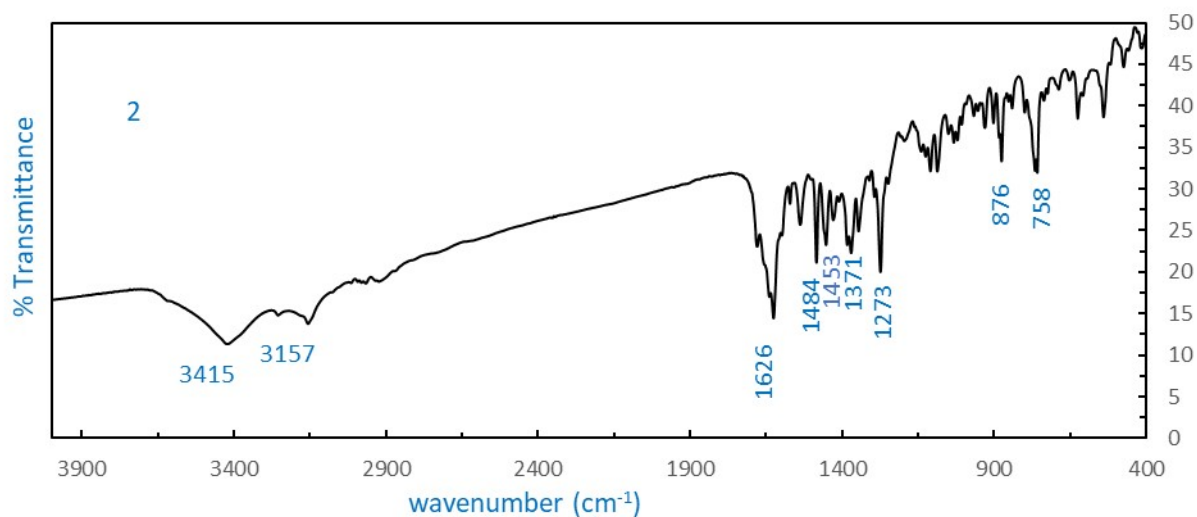

**Figure S6.** FTIR spectra of Complex 2 synthesized directly from H<sub>2</sub>L<sup>thr</sup>.

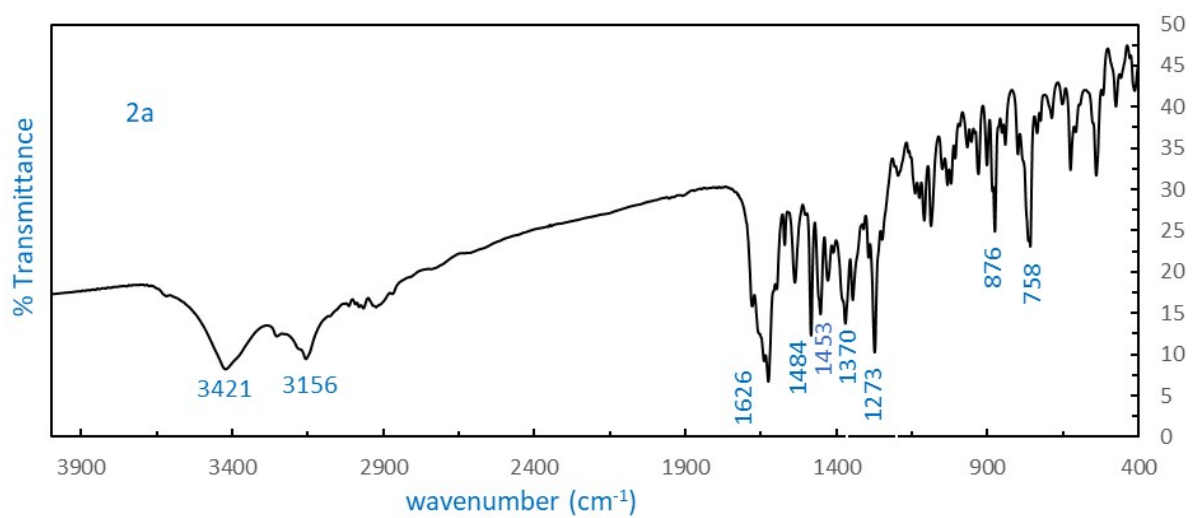

**Figure S7.** FTIR spectra of Complex 2 synthesized from Complex 1.

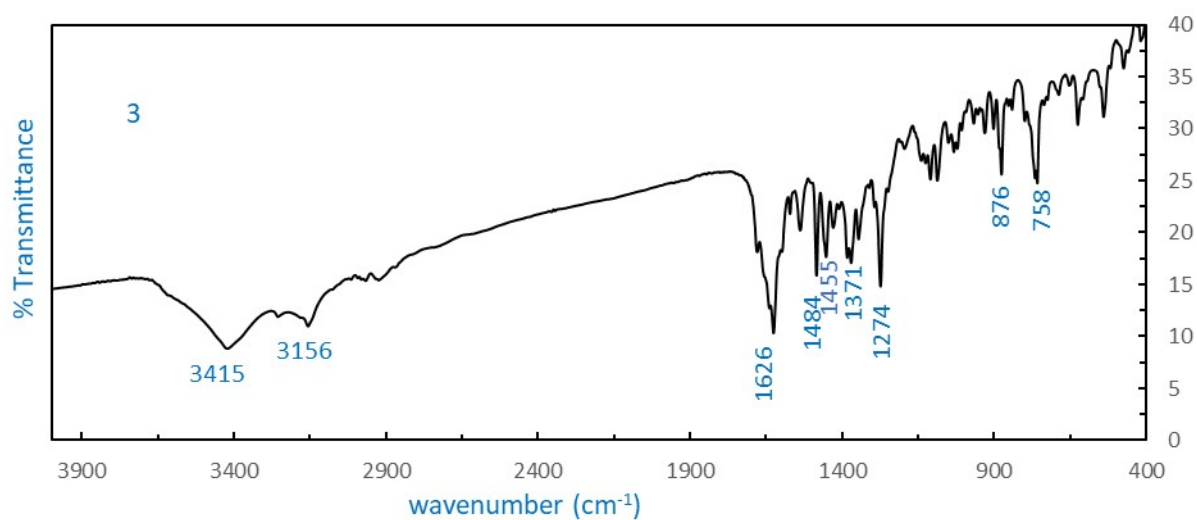

**Figure S8.** FTIR spectra of Complex 3 synthesized from Complex 2.

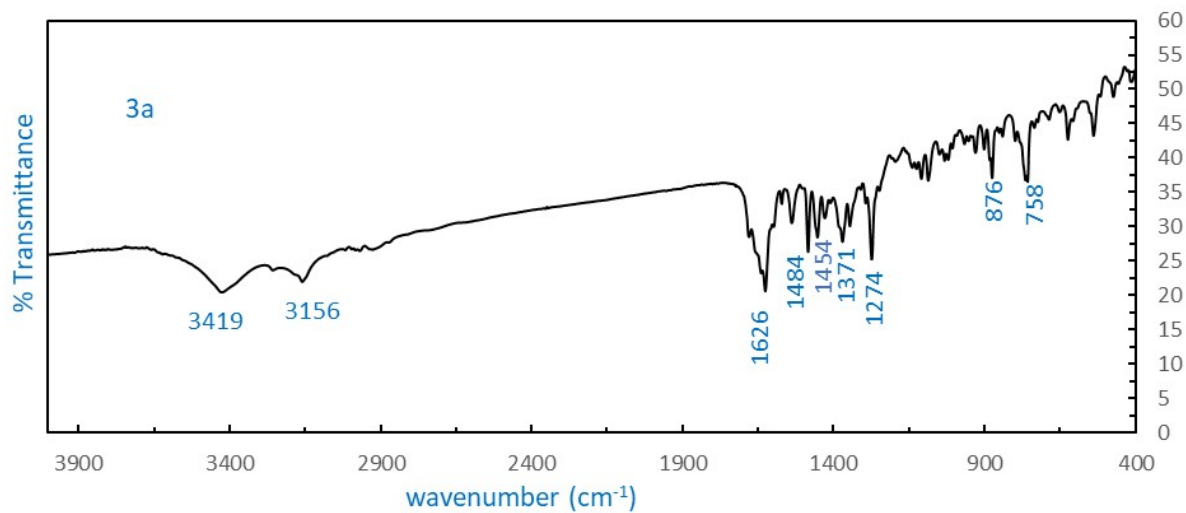

**Figure S9.** FTIR spectra of Complex 3 from Complex 1.

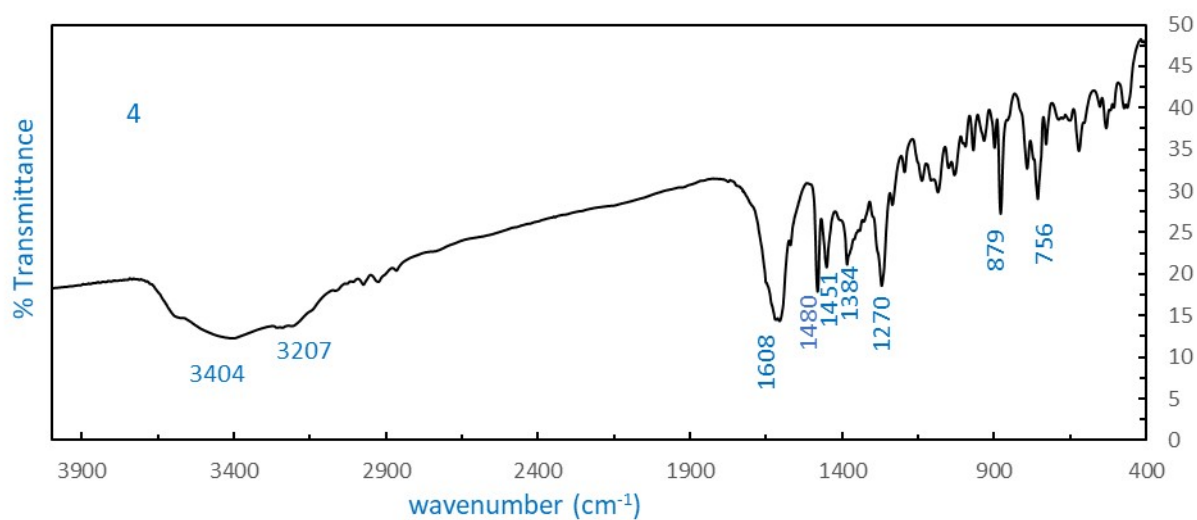

**Figure S10.** FTIR spectra of Complex 4 synthesized from Complex 2.

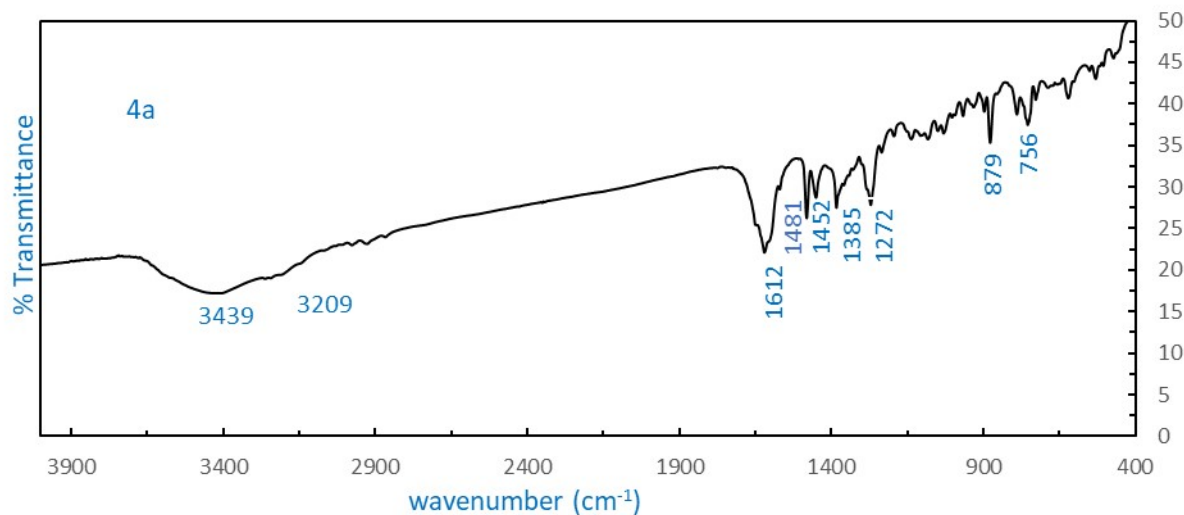

**Figure S11.** FTIR spectra of Complex 4 synthesized directly from  $\text{H}_2\text{L}^{\text{L-thr}}$ .

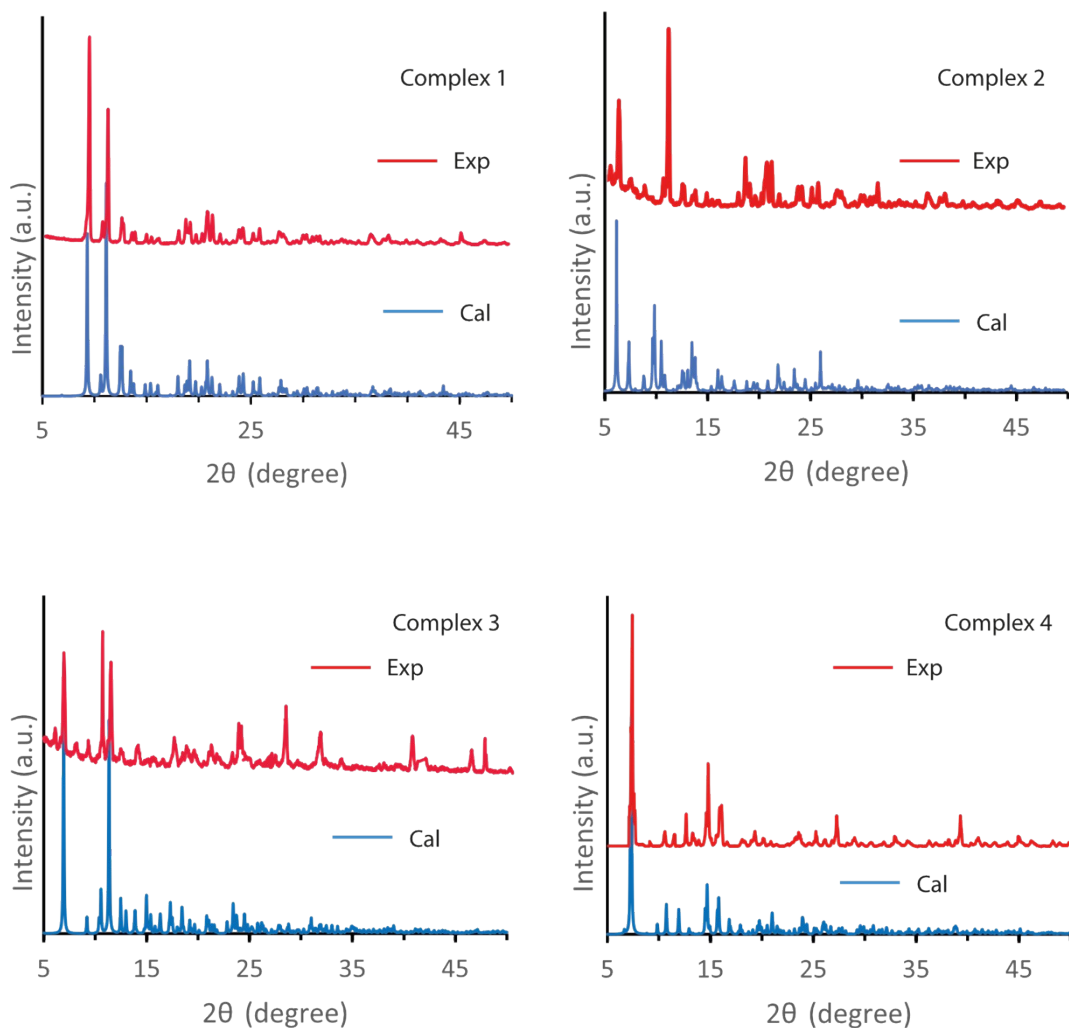

**Figure S11a.** Powder diffraction of the complexes along with calculated spectra from single crystal X-ray structures using Mercury software. Single crystal X-ray and bulk differ in number and type of solvent/water (Experimental section) due to desolvation and absorption of moisture, hence exp and cal plot may not match exactly.



**Note on H-bonding tables.** The following H-bonding tables were generated from PLATON<sup>1</sup>. As H's on some of the solvent molecules could not be located or refined, PLATON does not list those H-bonds. Those marked with \* were determined based on the distance from Mercury software by the Cambridge Crystallographic Data Centre.

1. (a) A.L.Spek, J. Appl. Cryst. 2003, 36, 7-11. Single-crystal structure validation with the program PLATON. (b) A.L.Spek, Acta Cryst. 2009, D65, 148-155. (c) A.L.Spek, Inorg. Chim. Acta 2018, 470, 232-237. (d) A.L.Spek, Acta Cryst. 2020, E76, 1-11.

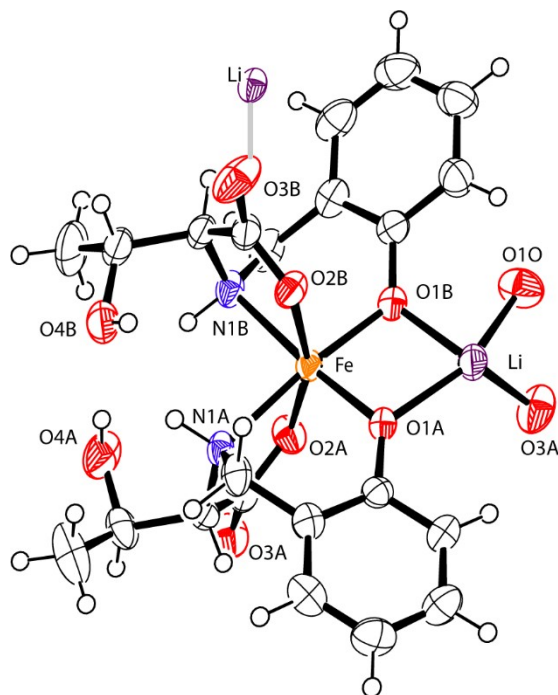

**Figure S12.** ORTEP diagram of Complex **1** with thermal ellipsoid set at 40% probability.

**Table S1.** Selected bond distance (Å) and angles (°) of Complex **1**

|        |          |              |           |
|--------|----------|--------------|-----------|
| Fe-O1A | 1.916(2) | O1A-Fe -O1B  | 86.04(9)  |
| Fe-O1B | 1.932(2) | O1A-Fe-O2A   | 100.17(9) |
| Fe-O2A | 2.012(2) | O1A -Fe -O2B | 95.87(9)  |
| Fe-O2B | 2.012(2) | O1A-Fe-N1A   | 89.52(9)  |
| Fe-N1A | 2.169(2) | O1A-Fe-N1B   | 173.17(9) |
| Fe-N1B | 2.192(2) | O1B-Fe-O2A   | 97.22(9)  |
| Li-O1A | 1.999(6) | O1B-Fe-O2B   | 95.49(9)  |
| Li-O1B | 2.026(6) | O1B-Fe-N1A   | 173.36(9) |
| Li-O10 | 1.897(6) | O1B-Fe-N1B   | 92.11(9)  |
| Li-O3A | 1.922(2) | O2A-Fe-O2B   | 160.14(9) |
|        |          | O2A-Fe-N1A   | 78.70(9)  |
|        |          | O2A-Fe-N1B   | 86.58(9)  |
|        |          | O2B-Fe-N1A   | 89.86(9)  |
|        |          | O2B-Fe-N1B   | 77.75(9)  |
|        |          | N1A-Fe-N1B   | 92.87(9)  |
|        |          | Fe -O1A-Li   | 96.99(18) |
|        |          | Fe-O1B-Li    | 95.56(18) |



**Table S2.** Non-covalent interactions in Complex 1.

| D-H...A        | D-H (Å) | H...A(Å) | D...A(Å) | DHA (°) |
|----------------|---------|----------|----------|---------|
| N1A- H1A...O4A | 0.9800  | 2.3100   | 2.787(3) | 109.00  |
| N1A- H1A...O4B | 0.9300  | 2.1500   | 3.085(3) | 160.00  |
| O4A-H4A...O4B  | 0.8900  | 2.1800   | 3.067(3) | 175.00  |
| O4A-H4A...N1A  | 0.8900  | 2.500    | 2.787(8) | 100.00  |
| O4B-H4B...O20  | 0.8200  | 1.9900   | 2.706(4) | 145.00  |
| C4A-H4AA...O3B | 0.9300  | 2.5100   | 3.246(4) | 136.00  |
| C9A-H9A...O1A  | 0.9300  | 2.5100   | 3.246(4) | 136.00  |
| O2B...O4A      |         |          | 2.750*   |         |
| O2A...O4B      |         |          | 2.863*   |         |

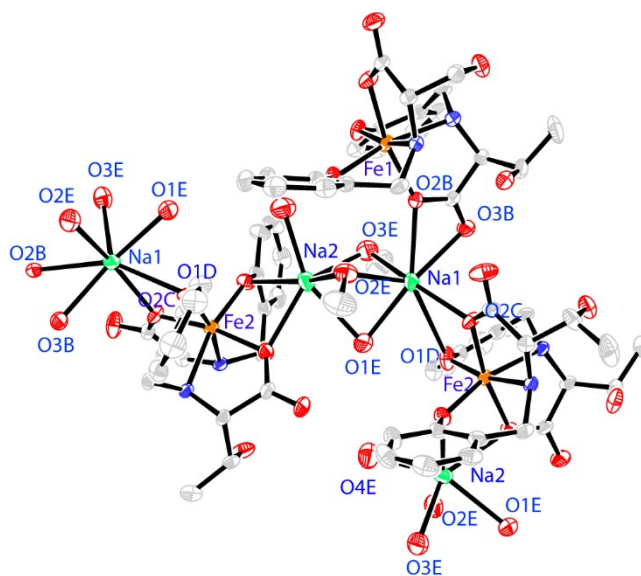**Figure S13.** ORTEP diagram of Complex 2 with thermal ellipsoid set at 40% probability.**Table S3.** Selected bond distance (Å) and angles (°) of Complex 2.

|         |          |               |            |
|---------|----------|---------------|------------|
| Fe1-O1A | 1.927(3) | O1A-Fe1 -O1B  | 93.60(13)  |
| Fe1-O1B | 1.902(3) | O1A-Fe1-O2A   | 99.02(13)  |
| Fe1-O2A | 2.034(3) | O1A -Fe1 -O2B | 91.61(12)  |
| Fe1-O2B | 2.012(3) | O1A-Fe1-N1A   | 89.00(13)  |
| Fe1-N1A | 2.191(4) | O1A-Fe1-N1B   | 167.77(14) |
| Fe1-N1B | 2.221(4) | O1B-Fe1-O2A   | 89.12(13)  |
| Fe2-O1C | 1.903(3) | O1B-Fe1-O2B   | 94.04(12)  |
| Fe2-O1D | 1.927(4) | O1B-Fe1-N1A   | 167.19(14) |
| Fe-O2C  | 1.991(3) | O1B-Fe1-N1B   | 92.47(13)  |
| Fe-O2D  | 2.004(3) | O2A-Fe1-O2B   | 168.71(13) |
| Fe2-N1C | 2.194(4) | O2A-Fe1-N1A   | 78.08(14)  |
| Fe2-N1D | 2.210(3) | O2A-Fe1-N1B   | 91.67(14)  |

|         |          |             |            |
|---------|----------|-------------|------------|
| Na1-O1E | 2.451(5) | O2B-Fe1-N1A | 98.44(14)  |
| Na1-O2B | 2.555(3) | O2B-Fe1-N1B | 77.38(14)  |
| Na1-O2C | 2.332(4) | N1A-Fe1-N1B | 87.42(13)  |
| Na1-O2E | 2.484(5) | O1C-Fe2-O2C | 99.10(13)  |
| Na1-O3B | 2.398(4) | O1C-Fe2-O2D | 89.02(13)  |
| Na1-O3E | 2.438(4) | O1C-Fe2-N1C | 90.02(13)  |
| Na2-O1E | 2.544(5) | O1C-Fe2-N1D | 165.82(12) |
| Na2-O2E | 2.409(6) | O1D-Fe-O2C  | 89.19(15)  |
| Na2-O3E | 2.419(4) | O1D-Fe-O2D  | 95.70(15)  |
| Na2-O4E | 2.365(5) | O1D-Fe-N1C  | 167.47(15) |
| Na2-O1C | 2.398(4) | O1D-Fe-N1D  | 89.98(14)  |
| Na2-O2D | 2.450(4) | O2C-Fe-O2D  | 170.01(13) |
|         |          | O2C-Fe-N1C  | 79.22(14)  |
|         |          | O2C-Fe-N1D  | 93.54(13)  |
|         |          | O2D-Fe-N1C  | 95.06(14)  |
|         |          | O2D-Fe-N1D  | 77.80(13)  |
|         |          | N1C-Fe-N1D  | 86.04(13)  |

**Table S4.** Non-covalent interactions in Complex 2.

| D-H...A         | D-H (Å) | H...A(Å) | D...A(Å) | DHA (°) |
|-----------------|---------|----------|----------|---------|
| O1-H1... O3A    | 0.8200  | 2.0300   | 2.841(6) | 172.00  |
| N1A-H1...O4A    | 0.9800  | 2.4700   | 2.873(5) | 104.00  |
| N1A-H1A... O4B  | 0.9800  | 2.0100   | 2.910(5) | 152.00  |
| N1B-H1B...O4A   | 0.9800  | 2.2200   | 3.155(5) | 159.00  |
| N1C-H1C...O4C   | 0.9800  | 2.3700   | 2.809(5) | 107.00  |
| N1C-H1C...O4D   | 0.9800  | 2.1200   | 3.046(6) | 157.00  |
| N1D-H1D...O4C   | 0.9800  | 2.2300   | 3.169(5) | 160.00  |
| O4A-H4A...O7E   | 0.9800  | 2.5200   | 2.869(7) | 101.00  |
| N1D-H1D...O4C   | 0.8200  | 1.9700   | 2.782(6) | 169.00  |
| O4B-H4B...O3C   | 0.8200  | 1.9500   | 2.735(5) | 177.00  |
| O4C-H4C...O1    | 0.8200  | 2.4600   | 2.768(6) | 178.00  |
| O4D-H4D...O2A   | 0.8200  | 1.9700   | 3.276(5) | 174.00  |
| O6E-H6E...O3A   | 0.8200  | 1.9200   | 2.776(6) | 165.00  |
| O7E-H7E...O6E   | 0.8200  | 2.18     | 2.736(8) | 172.00  |
| O4E-H4EA ...O1A | 0.86    | 2.13     | 2.869(5) | 137(6)  |
| O4E-H4EB...O3D  | 0.85    | 2.4600   | 2.976(5) | 177(13) |
| C1B-H1BA...O3C  | 0.9300  | 2.5700   | 3.136(7) | 129.00  |
| C9D-H9D...O1B   | 0.9800  | 2.4200   | 3.059(5) | 122.00  |
| C9D-H9D...O3D   | 0.9800  | 2.5800   | 2.907(6) | 100.00  |
| C7D-H7DB...O3B  | 0.9700  | 2.5300   | 3.488(5) | 170.00  |
| O4A...O7E       |         |          | 2.740*   |         |

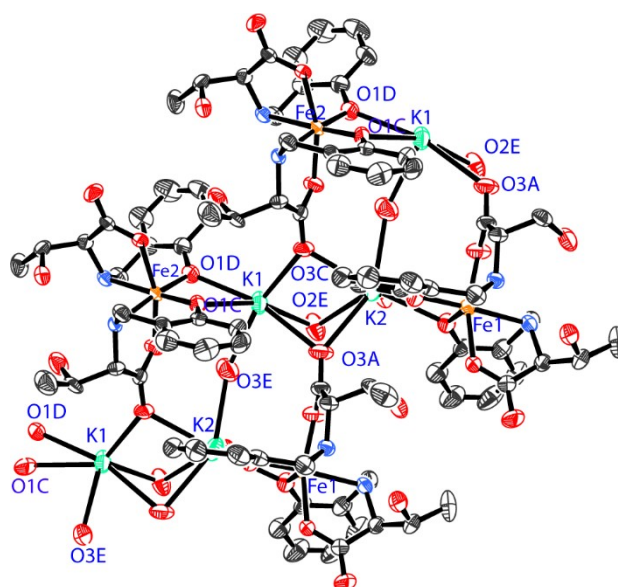

**Figure S14.** ORTEP diagram of Complex **3** with thermal ellipsoid set at 40% probability.

**Table S5.** Selected bond distance (Å) and angles (°) of the Complex **3**.

|         |           |               |            |
|---------|-----------|---------------|------------|
| Fe1-O1A | 1.902(5)  | O1A-Fe1 -O1B  | 95.02(2)   |
| Fe1-O1B | 1.908(5)  | O1A-Fe1-O2A   | 96.14(19)  |
| Fe1-O2A | 2.022(6)  | O1A -Fe1 -O2B | 97.07(19)  |
| Fe1-O2B | 2.019(4)  | O1A-Fe1-N1A   | 87.4(2)    |
| Fe1-N1A | 2.165(5)  | O1A-Fe1-N1B   | 172.9(2)   |
| Fe1-N1B | 2.210(5)  | O1B-Fe1-O2A   | 91.95(18)  |
| Fe2-O1C | 1.908 (4) | O1B-Fe1-O2B   | 95.98(18)  |
| Fe2-O1D | 1.915(5)  | O1B-Fe1-N1A   | 171.22(19) |
| Fe-O2C  | 2.017(4)  | O1B-Fe1-N1B   | 90.64(19)  |
| Fe-O2D  | 2.021(5)  | O2A-Fe1-O2B   | 163.93(19) |
| Fe2-N1C | 2.168(5)  | O2A-Fe1-N1A   | 79.4(2)    |
| Fe2-N1D | 2.201(4)  | O2A-Fe1-N1B   | 88.07(19)  |
| K1-O1C  | 2.696(5)  | O2B-Fe1-N1A   | 92.1(2)    |
| K1-O1D  | 2.693(6)  | O2B-Fe1-N1B   | 77.92(19)  |
| K1-O2E  | 2.721(5)  | N1A-Fe1-N1B   | 87.70(19)  |
| K1-O3E  | 2.840(5)  | O1C-Fe2-O2C   | 94.45(19)  |
| K1-O3A  | 2.849(6)  | O1C-Fe2-O2D   | 97.26(19)  |
| K2-O3D  | 2.805(6)  | O1C-Fe2-N1C   | 96.04(19)  |
| K2-O1A  | 2.679(6)  | O1C-Fe2-N1D   | 87.5(2)    |
| K2-O1B  | 2.717(6)  | O1D-Fe-O2C    | 172.5(2)   |
| K2-O3A  | 2.825(6)  | O1D-Fe-O2D    | 93.3(19)   |
| K2-O3C  | 2.838(6)  | O1D-Fe-N1C    | 96.04(19)  |
| K2-O3E  | 2.803(6)  | O1D-Fe-N1D    | 172.0(2)   |
|         |           | O2C-Fe-O2D    | 90.8(18)   |
|         |           | O2C-Fe-N1C    | 162.93(17) |
|         |           | O2C-Fe-N1D    | 78.76(19)  |
|         |           | O2D-Fe-N1C    | 87.84(17)  |
|         |           | O2D-Fe-N1D    | 91.2(19)   |

|  |  |            |          |
|--|--|------------|----------|
|  |  | N1C-Fe-N1D | 88.1(19) |
|--|--|------------|----------|

**Table S6.** Non-covalent interactions in the Complex **3**.

| D-H...A         | D-H (Å) | H...A(Å) | D...A(Å)  | DHA (°) |
|-----------------|---------|----------|-----------|---------|
| O00C-H00C...O2E | 0.8200  | 1.900    | 2.708(6)  | 170.00  |
| N1A-H1...O4A    | 0.9800  | 2.3100   | 2.792(6)  | 109.00  |
| N1A-H1A...O4B   | 0.9800  | 2.0300   | 2.940(7)  | 154.00  |
| N1B-H1B...O4A   | 0.9800  | 2.5100   | 3.419(6)  | 155.00  |
| N1B-H1B...O4B   | 0.9800  | 2.5300   | 2.877(7)  | 100.00  |
| N1C-H1C...O00C  | 0.9800  | 2.0700   | 3.001(7)  | 158.00  |
| N1C-H1C...O4C   | 0.9800  | 2.3600   | 2.822(8)  | 108.00  |
| N1D-H1D...O00C  | 0.9800  | 2.5200   | 2.869(7)  | 101.00  |
| N1D-H1D...O4C   | 0.9800  | 2.5500   | 3.461(7)  | 155.00  |
| O4A-H4A...O2B   | 0.8200  | 2.1000   | 2.904(6)  | 166.00  |
| O4B-H4B...O1E   | 0.8200  | 1.9000   | 2.712(8)  | 172.00  |
| O4C-H4C...O2D   | 0.8200  | 2.1500   | 2.952(6)  | 167.00  |
| C9A-H9A...O1A   | 0.9800  | 2.5000   | 3.354 (8) | 146.00  |
| C9A-H9A...O3A   | 0.9800  | 2.5300   | 2.879(7)  | 101.00  |
| C9C-H9C...O1C   | 0.9800  | 2.4300   | 3.257(8)  | 142.00  |
| C9C-H9C...O3C   | 0.9800  | 2.5800   | 2.906(9)  | 100.00  |

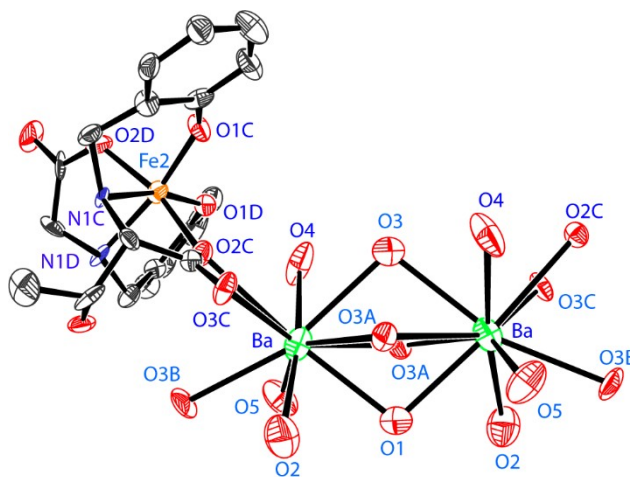

**Figure S15.** ORTEP diagram of the Complex **4** with thermal ellipsoid set at 40% probability.

**Table S7.** Selected bond distance (Å) and angles (°) of the Complex 4.

|           |           |                 |          |
|-----------|-----------|-----------------|----------|
| Fe1-O1A   | 1.888(16) | O1A-Fe1 -O2A    | 99.7(7)  |
| Fe1-O2A   | 2.036(17) | O1A-Fe1-N1A     | 89.6(6)  |
| Fe1-N1A   | 2.197(17) | O1A-Fe1-O1A_b   | 98.0(7)  |
| Fe1-O1A_b | 1.888(16) | O1A-Fe1-O2A_b   | 87.8(7)  |
| Fe1-O2A_b | 2.036(17) | O1A-Fe1-N1A_b   | 165.0(7) |
| Fe1-N1A_b | 2.197(17) | O2A-Fe1-N1A     | 78.1(7)  |
| Fe2-O1C   | 1.903(16) | O2A-Fe1-O2A_b   | 168.3(7) |
| Fe2-O2C   | 2.033(18) | O2A-Fe1-N1A_b   | 93.3(7)  |
| Fe2-N1C   | 2.208(17) | N1A-Fe1-N1A_b   | 86.2(6)  |
| Fe-O1B_d  | 1.924(15) | O1C-Fe2-O2C     | 93.9(7)  |
| Fe2-O2B_d | 2.024(18) | O1C-Fe2-O1B_b   | 97.8(7)  |
| Fe2-N1B_d | 2.201(19) | O1C-Fe2-N1C     | 89.9(7)  |
| Ba-O1     | 2.815(17) | O2C-Fe2-N1C     | 78.6(7)  |
| Ba-O2     | 2.76(2)   | N1C-Fe2-O2B_d   | 91.7(7)  |
| Ba-O3B    | 2.956(19) | N1C-Fe1-N1B_d   | 84.3(7)  |
| Ba-O2C    | 3.018(17) | O2C-Fe-N1B_d    | 92.1(7)  |
| Ba-O3     | 2.91(3)   | O1B_d-Fe2-O2B-d | 98.0(7)  |
| Ba-O3A    | 3.052(17) | O1B_d-Fe2-N1B_d | 89.2(7)  |
| Ba-O3C    | 2.788(17) | O2B_d-Fe-N1B_d  | 77.5(7)  |
| Ba-O4     | 2.89(2)   | O2C-Ba-O3C      | 44.6(5)  |
| Ba-O5     | 2.76(2)   | O3B-Ba-O3A      | 124.2(5) |
|           |           | O3B-Ba-O3C      | 72.4(5)  |
|           |           | O2C-Ba-O3A      | 113.7(5) |
|           |           | O2C-Ba-O3B      | 70.7(5)  |
|           |           | O3A-Ba-O3C      | 76.5(5)  |

**Table S8.** Non-covalent interactions in the Complex 4.

| D-H...A       | D-H (Å) | H...A(Å) | D...A(Å) | DHA (°) |
|---------------|---------|----------|----------|---------|
| N1C-H1C...O4C | 0.9800  | 2.4800   | 2.86(2)  | 102.00  |
| N1C-H1C...O4B | 0.9800  | 2.1100   | 3.03(2)  | 155.00  |
| O4C-H4C...O3B | 0.8200  | 2.1800   | 3.00(2)  | 176.00  |
| O4C-H4C...O2B | 0.8200  | 2.5300   | 3.12(2)  | 130.00  |
| N1B-H1B...O4B | 0.9800  | 2.5200   | 2.90(2)  | 103.00  |
| N1B-H1B...O4C | 0.9800  | 2.0500   | 2.95(2)  | 153.00  |
| O4B-H4B...O7  | 0.8200  | 2.090    | 2.84(3)  | 152.00  |
| N1A-H1A...O4A | 0.9800  | 2.5200   | 2.89(2)  | 102.00  |
| N1A-H1A...O4A | 0.9800  | 2.2300   | 3.15(2)  | 156.00  |
| C4C-H4CA...Cl | 0.8200  | 2.8100   | 3.69(4)  | 157.00  |

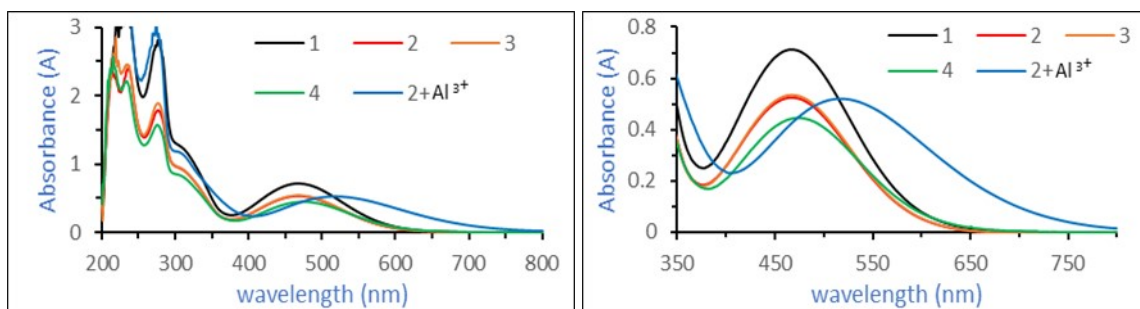

**Figure S16.** UV-Visible spectra of the complexes in Water.

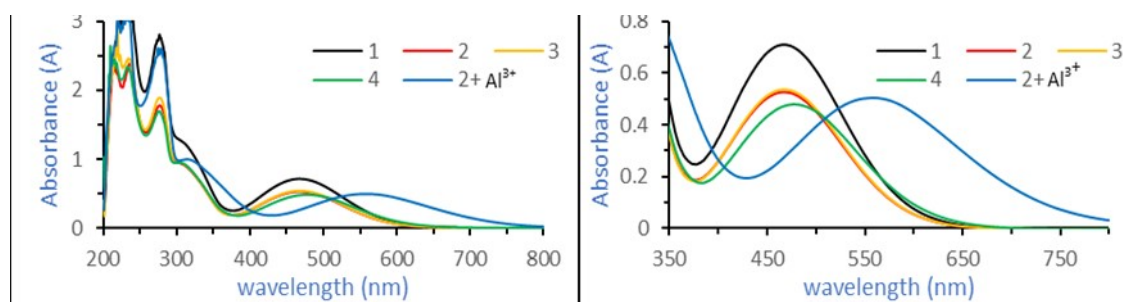

**Figure S17.** UV-Visible spectra of the complexes in MeOH.

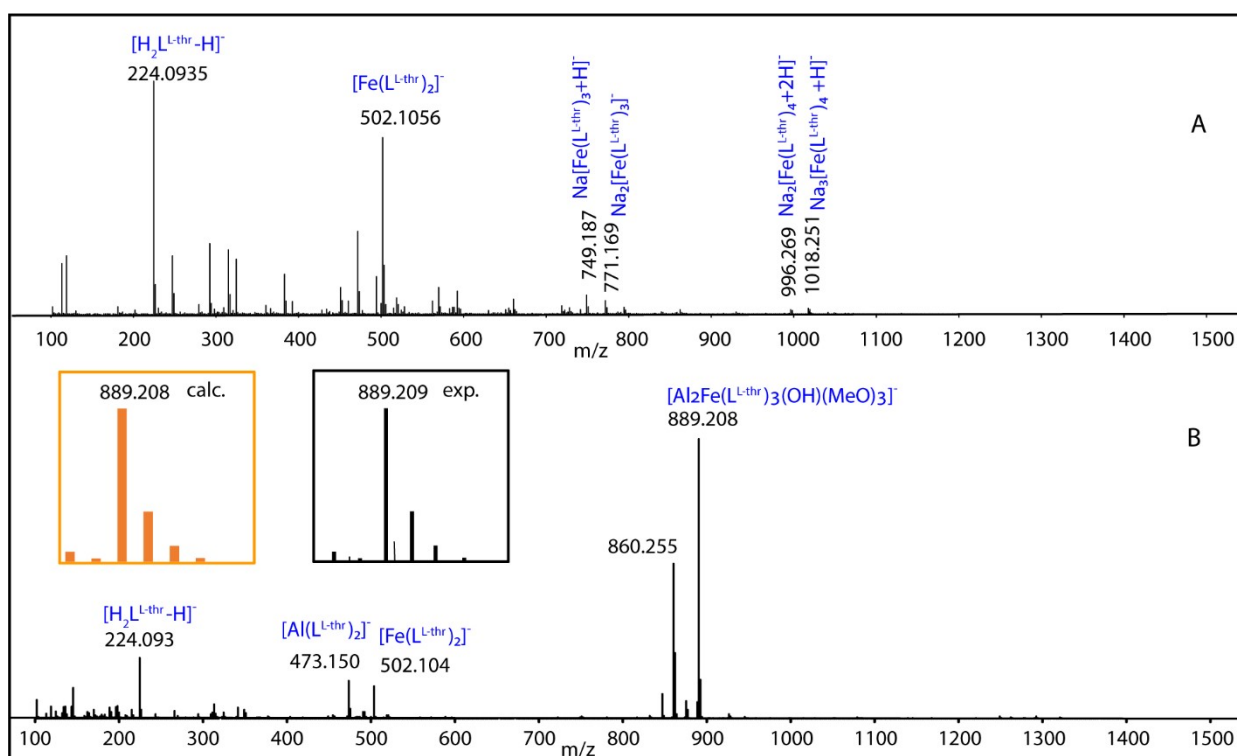

**Figure S18.** ESI-Mass spectra of the Complex 2 (A) before and (B) after addition of aluminium salt in MeOH.
